# Supplementary material for: Early potential effects of resveratrol supplementation on skeletal muscle adaptation involved in exercise-induced weight loss in obese mice
Source: PubMed Central journal article supplement — BMB Rep. 2018 Apr 30;51(4):200–5. doi: 10.5483/BMBRep.2018.51.4.236 (PMC5933216; doi:10.5483/bmbrep.2018.51.4.236), 2018-04-30
Supplement: bmb-51-200_suppl.pdf [file bmb-51-200_suppl.pdf]

1 **Manuscript Type:** Article

2 **Title:** Early Potential Effects of Resveratrol Supplementation on Skeletal Muscle  
3 **Adaptation Involved in Exercise-induced Weight Loss in Obese Mice**

4 **Author's name:** Jingyu Sun <sup>1, #</sup>, Chen Zhang <sup>2, #</sup>, MinJeong Kim <sup>3</sup>, Yajuan Su <sup>4</sup>, Lili Qin <sup>1</sup>,  
5 Jingmei Dong <sup>1</sup>, Yunhe Zhou <sup>1</sup>, Shuzhe Ding <sup>5, \*</sup>

6 **Affiliation:** <sup>1</sup> Sports and Health Research Center, Tongji University Department of Physical  
7 Education, Shanghai, 200092, China

8 <sup>2</sup> Tongji University School of Medicine, Shanghai, 200092, China

9 <sup>3</sup> Chung-Ang University College of Medicine, Seoul, 156755, South Korea

10 <sup>4</sup> Tongji University School of Life Sciences and Technology, Shanghai, 200092, China

11 <sup>5</sup> Key Laboratory of Adolescent Health Assessment and Exercise Intervention, East China  
12 Normal University, Shanghai, 200241, China

13 # These authors contributed equally to this work.

14 **Running Title:** Muscle Adaptation in Weight Loss of Obese Mice

15 **Keywords:** weight loss; glucose and lipids homeostasis; skeletal muscle adaptation; endurance  
16 exercise; resveratrol.

17 \* **Corresponding Author's Information:** Key Laboratory of Adolescent Health  
18 Assessment and Exercise Intervention, East China Normal University, Dongchuan  
19 Road 500, Shanghai, 200241, China; Tel: +86-21-5434-2612; Fax: +86-21-5434-2612;  
20 E-mail: szding@tyxx.ecnu.edu.cn.

21

22

1 **Supplemental Material**

2 Table S1. Primers used for quantitative RT-PCR analysis.

| <b>Gene name</b> | <b>Forward (5'→3')</b>  | <b>Reverse (5'→3')</b>  |
|------------------|-------------------------|-------------------------|
| <i>ND1</i>       | CCTATCACCCCTTGCCATCAT   | GAGGCTGTTGCTTGTGTGAC    |
| <i>Pecam1</i>    | ATGGAAAGCCTGCCATCATG    | TCCTTGTTGTTTCAGCATCAC   |
| <i>PGC-1α</i>    | ATGGAGTGACATAGAGTGTGCT  | CCACTTCAATCCACCCAGAAAG  |
| <i>NRF1</i>      | TATGGCGGAAGTAATGAAAGACG | CAACGTAAGCTCTGCCTTGTT   |
| <i>ERRα</i>      | GGGGAGCATCGAGTACAGC     | AGACGCACACCCTCCTTGA     |
| <i>Tfam</i>      | ATTCCGAAGTGTTTTTCCAGCA  | TCTGAAAGTTTTGCATCTGGGT  |
| <i>Drp1</i>      | TTACGGTTCCCTAAACTTCACG  | GTCACGGGCAACCTTTTACGA   |
| <i>Fis1</i>      | TGTCCAAGAGCACGCAATTTG   | CTCGCACATACTTTAGAGCC    |
| <i>Mfn1</i>      | ATGGCAGAAACGGTATCTCCA   | CTCGGATGCTATTCGATCAAGTT |
| <i>Mfn2</i>      | CTGGGGACCGGATCTTCTTC    | CTGCCTCTCGAAATTCTGAAACT |
| <i>OPA1</i>      | CGACTTTGCCGAGGATAGCTT   | CGTTGTGAACACACTGCTCTTG  |
| <i>I(Myh7)</i>   | CCTGCGGAAGTCTGAGAAGG    | CTCGGGACACGATCTTGGC     |
| <i>IIA(Myh2)</i> | ACTTTGGCACTACGGGGAAAC   | CAGCAGCATTTCGATCAGCTC   |
| <i>IIX(Myh1)</i> | GCGAATCGAGGCTCAGAACAA   | GTAGTTCCGCCTTCGGTCTTG   |
| <i>IIB(Myh4)</i> | CTTTGCTTACGTCAGTCAAGGT  | AGCGCCTGTGAGCTTGTAAG    |
| <i>B-actin</i>   | GGCTGTATTCCCCTCCATCG    | CCAGTTGGTAACAATGCCATGT  |

3

4
